# Supplementary material
Source: publisher site journal article supplement (https://en-cdn.bio-protocol.org/attached/file/20210125/Supplementary%20file%20biofilm%20inhibition%20data.xlsx)
Supplement: Supplementary file 1 [file Supplementary%20file%20biofilm%20inhibition%20data.xlsx]

## Sheet: Biofilm Inhibition Data
	C. tropicalis U71*	Biofilm Formation (Optical Density Value)	Biofilm Inhibition (%)
	Negative Control	0.002
	0% Lemongrass Oil Coated Silicone Rubber	2.109	18.821
	2% Lemongrass Oil Coated Silicone Rubber	0.956	63.2441
	4% Lemongrass Oil Coated Silicone Rubber	0.836	67.8675
	8% Lemongrass Oil Coated Silicone Rubber	0.781	69.9865
	Positive Control (Silicone Rubber Surface without Coating)	2.5975	0
	*These results belong to the 1st experiment with C. tropicalis U71 strain.
